# Supplementary material for: Introducing high-valence molybdenum to stimulate lattice oxygen in a NiCo LDH cathode for chloride ion batteries
Source: Royal Society of Chemistry journal article supplement (doi:10.1039/d3mh00706e), 2023-01-01
Supplement: d3mh00706e1.pdf [file d3mh00706e1.pdf]

## Electronic Supplementary Information

### Introducing high-valence molybdenum to stimulate lattice oxygen in NiCo LDH cathode for chloride ion batteries

*Shuhan Yang,<sup>#, a</sup> Qing Yin<sup>#, \*, a</sup>, Zhihao Song,<sup>a</sup> Fan Xu,<sup>a</sup> Zelin Xie,<sup>a</sup> Yunjia Wu,<sup>b</sup> Shilin Xu,<sup>a</sup> Yong-Zhi Li,<sup>a</sup> Danyang Zhao,<sup>a</sup> Bin Xiao,<sup>a</sup> Xiaolan Xue,<sup>a</sup> Jiqiu Qi,<sup>a</sup> Yanwei Sui<sup>\*, a</sup> and Jingbin Han<sup>b</sup>*

[#] *These authors contributed equally to this work.*

a: Jiangsu Province Engineering Laboratory of High Efficient Energy Storage Technology and Equipments  
School of Materials and Physics  
China University of Mining and Technology  
Xuzhou 221116, P. R. China

b: State Key Laboratory of Chemical Resource Engineering  
Beijing Advanced Innovation Center for Soft Matter Science and Engineering  
Beijing University of Chemical Technology  
Beijing 100029, P. R. China

\* Corresponding authors. E-mail: [tbh251@cumt.edu.cn](mailto:tbh251@cumt.edu.cn) (Qing Yin)

[wyds123456@outlook.com](mailto:wyds123456@outlook.com) (Yanwei Sui)

## Material Characterization

The crystal structure was analyzed by Cu K $\alpha$  ( $\lambda=0.1518$  nm) X-ray diffraction (XRD, Bruker D8) between 5 and 70° at a scanning rate of 10° min<sup>-1</sup>. X-ray photoelectron spectroscopy (Thermo ESCALAB 250XI) technique was used to determine the chemical status of LDHs samples with monochromatic Al K $\alpha$  X-ray source ( $h\nu = 1486.6$  eV). The morphological characteristics of the materials were monitored via a Zeiss Supra 55 field emission scanning electron microscope (SEM) with an accelerating voltage of 20 kV. The transmission electron microscopy (TEM) investigations were recorded through a FEI TalosF200S microscope under an acceleration voltage of 200 kV, which is equipped with an energy dispersive X-ray detector. Fourier transform infrared (FTIR) spectra were collected using the Vector 22 (Bruker) spectrophotometer with a 2 cm<sup>-1</sup> resolution. The proportion of different elements was determined by inductively coupled plasma emission spectrometry (Shimadzu ICPS7500). The thermogravimetric analyzer (TGA) was performed on a PCT-1A thermal analysis system in an air atmosphere with heating rates of 10 °C min<sup>-1</sup> ranging from 30 °C to 800 °C.

## Calculation details.

The theoretical calculations were performed by the density functional theory (DFT) using the Vienna Ab-initio Simulation Package (VASP) package with the projector augmented wave (PAW) method. The generalized gradient approximation (GGA) with the Perdew-Burke-Ernzerhof (PBE) functional were used to describe the exchange-functional. The simulation was run with a cutoff energy of 450 eV throughout the computations and the force on each atom less than 0.02 eV/Å was set for convergence criterion of geometry relaxation. In the calculations, a 3×3×1  $k$ -point sampling was used in the surface Brillouin zone and the self-consistent calculations apply a convergence energy threshold of 10<sup>-5</sup> eV. 15 Å vacuum was added along the  $z$  direction in order to avoid the interaction between periodic structures. The intensity of the adsorption behaviour calculating with the following equation was used as the evaluation basis for the selection of Cl adsorption sites.

$$E_{ad} = \frac{E_{basal+atom} - E_{basal}}{n} - E_{atom}$$

where  $E_{basal+atom}$  and  $E_{basal}$  are the energy of the Cl adsorbed on the surface and the energy of LDH models;  $n$  is the number of Cl atoms and  $E_{atom}$  is the chemical potential of an isolated Cl atom in vacuum.

**Reagents and Materials.** Cobalt nitrate hexahydrate ( $\text{Co}(\text{NO}_3)_2 \cdot 6\text{H}_2\text{O}$ , 99%), Nickel nitrate hexahydrate ( $\text{Ni}(\text{NO}_3)_2 \cdot 6\text{H}_2\text{O}$ , 99%), sodium molybdate ( $\text{Na}_2\text{MoO}_4$ , 96%) and urea were purchased from Shanghai Aladdin Industrial. 1-Butyl-1-methylpyrrolidinium chloride (Bpy14Cl, 99%, IoLiTech) and propylene carbonate (PC) were purchased from Shanghai (China) Ailei Chemical Co. Ltd. Acetylene black conductor and polyvinylidene fluoride (PVDF) binder were obtained from Shenzhen (China) Kejing Co. Ltd. All reagents are analytical grade and used without further purification.

**Synthesis of  $\text{Mo}_{0.3}\text{NiCo}_2\text{-CO}_3$  LDH.**  $\text{Mo}_{0.3}\text{NiCo}_2\text{-CO}_3$  LDH sample was synthesized by one-step hydrothermal method as follows. 2 mmol of  $\text{Co}(\text{NO}_3)_2 \cdot 6\text{H}_2\text{O}$ , 1 mmol of  $\text{Ni}(\text{NO}_3)_2 \cdot 6\text{H}_2\text{O}$  and 0.3 mmol of  $\text{Na}_2\text{MoO}_4 \cdot 2\text{H}_2\text{O}$  were dissolved in a mixed solution, which was composed of 20 ml deionized water and 60 ml ethanol with 18 mmol of urea as ammonia releasing agent. Then, the above solution was placed in a 100 ml stainless-steel Teflon-lined autoclave for 10 hours at 100 °C. The resulting LDHs slurry was cooled to room temperature and washed with deionized water and ethanol for several times. The  $\text{Mo}_{0.3}\text{NiCo}_2\text{-CO}_3$  LDH powder was obtained after dried at 60 °C for overnight.  $\text{Mo}_x\text{NiCo}_2\text{-Cl}$  LDH samples with different molybdenum doping proportions ( $x = 0, 0.1, 0.2, 0.4, 0.5$ ) were prepared by changing the mass of  $\text{Na}_2\text{MoO}_4$  from 0 mmol to 0.5 mmol.

**Synthesis of  $\text{Mo}_x\text{NiCo}_2\text{-Cl}$  LDH.** The  $\text{Mo}_x\text{NiCo}_2\text{-Cl}$  LDH were obtained via the typical anion-exchange process. Firstly, 0.4g as-prepared  $\text{Mo}_{0.3}\text{NiCo}_2\text{-CO}_3$  LDH powder was dissolved in 500 ml of decarbonized water consisted of 2 M NaCl and 5 mM HCl. Then, the flask filled with the mixed solution was constantly vigorous stirring for 24 hours under  $\text{N}_2$  gas protection. The resulting  $\text{Mo}_x\text{NiCo}_2$  LDH inserted with chloride ions were collected by a centrifuge process with boiled water followed by drying in a vacuum oven at 60 °C for overnight.

### Electrochemical measurements

The  $\text{Mo}_x\text{NiCo}_2\text{-Cl}$  LDH cathodes were prepared by mixing 70 wt% active materials, 20 wt% acetylene black and 10 wt% PVDF to form a homogeneous slurry in NMP. The obtained slurry was coated on 0.08 mm graphite paper current collector using a 100  $\mu\text{m}$  blade and vacuum-dried at 100 °C for 12 h. All electrodes were cut into disks with diameter of 12 mm and the average mass loading of which was about 1.2  $\text{mg cm}^{-2}$ . The LDHs-based chloride ion batteries (CIBs) were assembled with CR2032 coin cells using Li metal foil and glass fiber filter (GF/D, Whatman) separator. 0.5 M Bpy14Cl dissolved in

PC solvent was used as electrolyte. The galvanostatic charge/discharge measurements were carried out on LANHE CT3002AU battery testing devices. Cyclic voltammetry (CV) and electrochemical impedance spectra (EIS) results were tested on the CHI 660e electrochemical workstation.

## Supplementary Figures and Tables

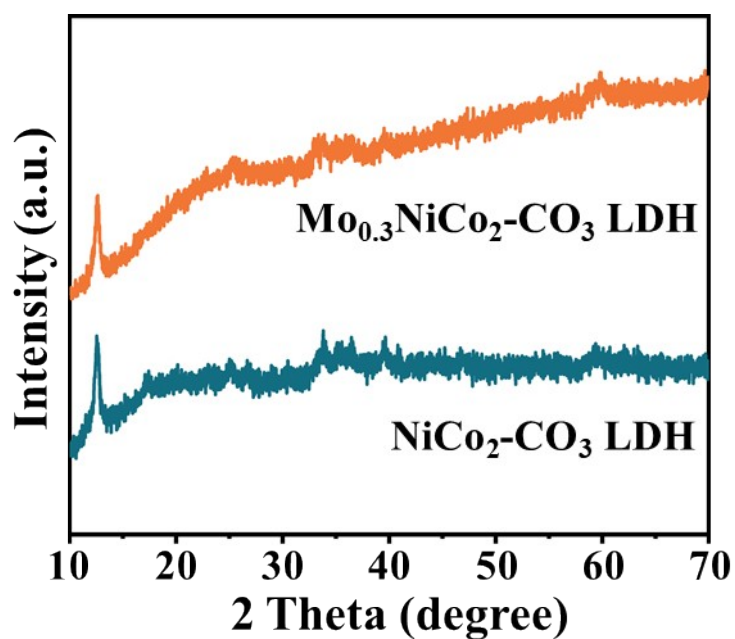

**Fig. S1.** Powder XRD patterns of  $\text{NiCo}_2\text{-CO}_3$  LDH and  $\text{Mo}_{0.3}\text{NiCo}_2\text{-CO}_3$  LDH samples.

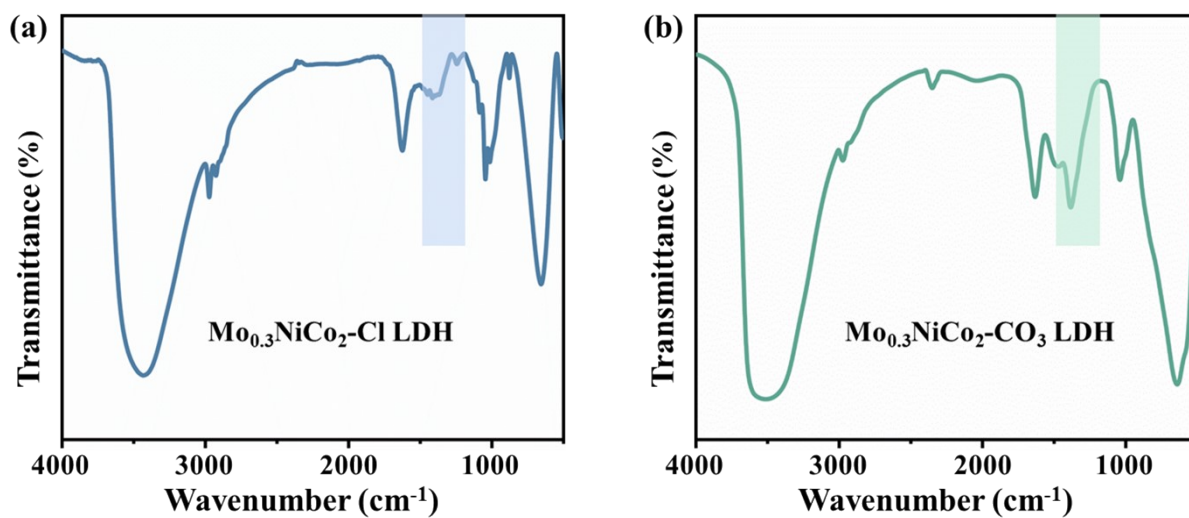

**Fig. S2.** IR spectra of (a)  $\text{Mo}_{0.3}\text{NiCo}_2\text{-Cl}$  LDH and (b)  $\text{Mo}_{0.3}\text{NiCo}_2\text{-CO}_3$  LDH.

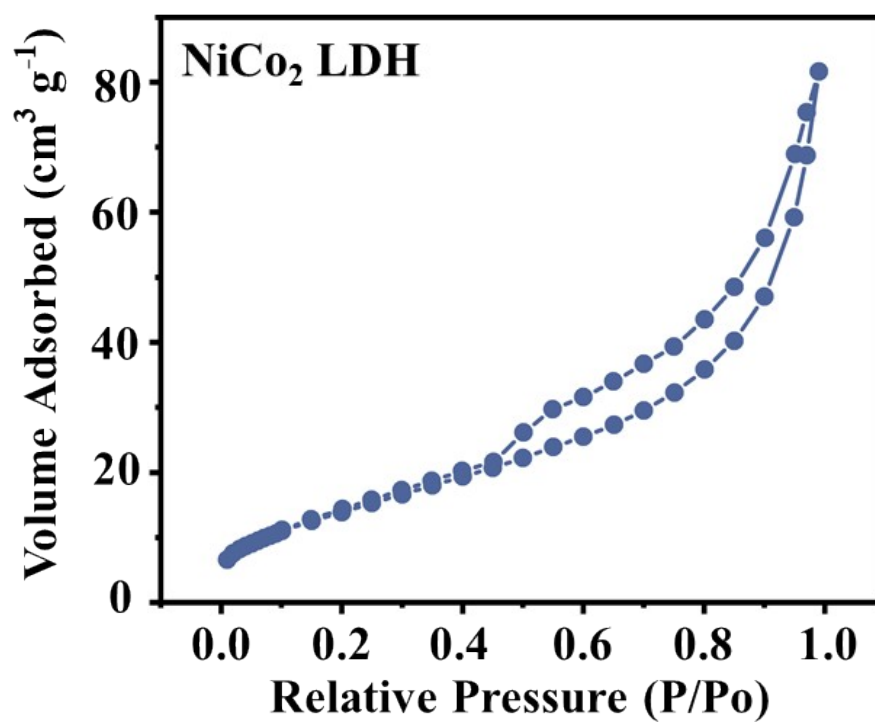

**Fig. S3.** N<sub>2</sub> sorption isotherm of NiCo<sub>2</sub>-Cl LDH.

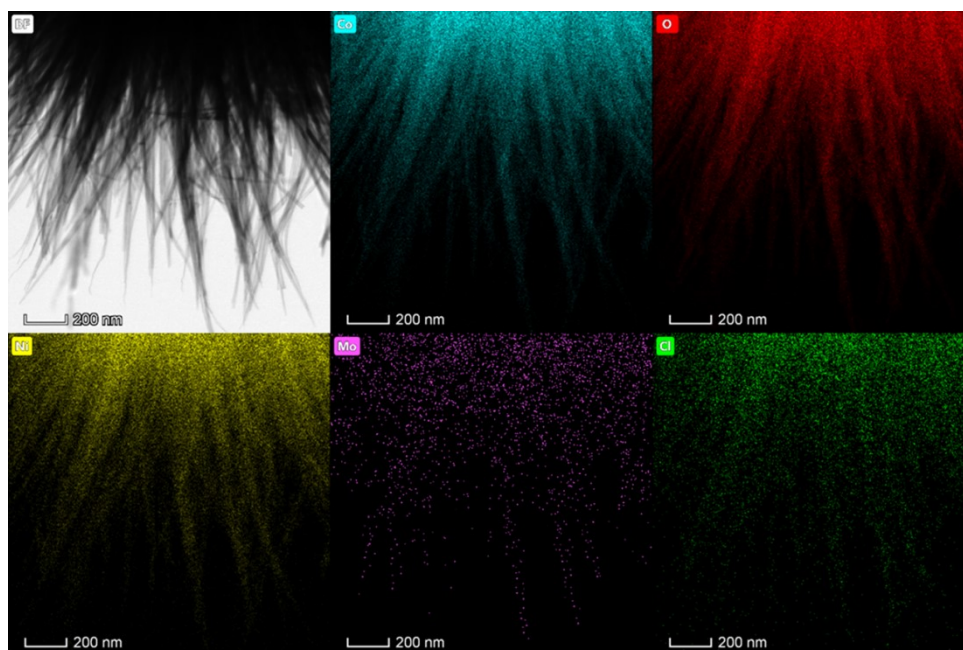

**Fig. S4.** The EDS mapping for enlarged sea urchin-like structure of Mo<sub>0.3</sub>NiCo<sub>2</sub>-Cl LDH.

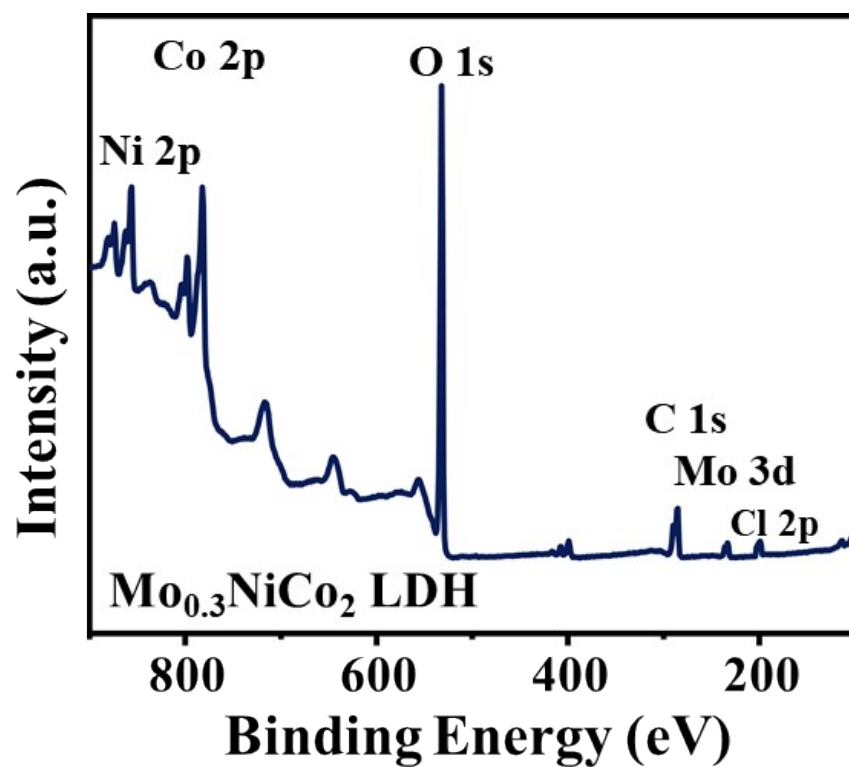

Fig. S5. XPS survey spectrum of  $\text{Mo}_{0.3}\text{NiCo}_2\text{-Cl}$  LDH.

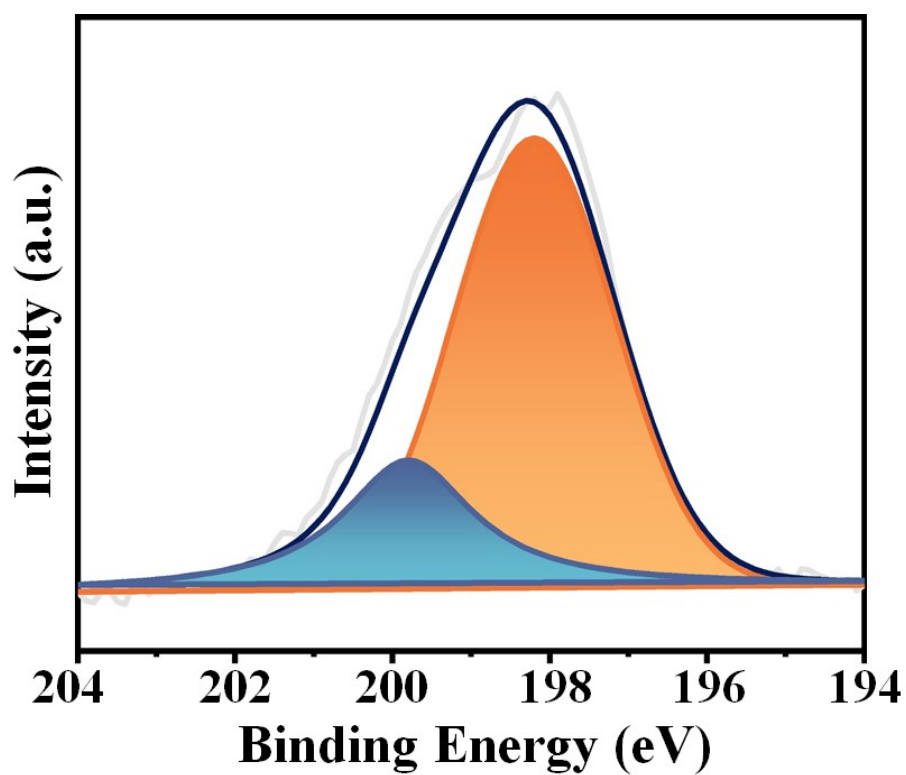

Fig. S6. Cl 2p spectrum of  $\text{Mo}_{0.3}\text{NiCo}_2\text{-Cl}$  LDH sample.

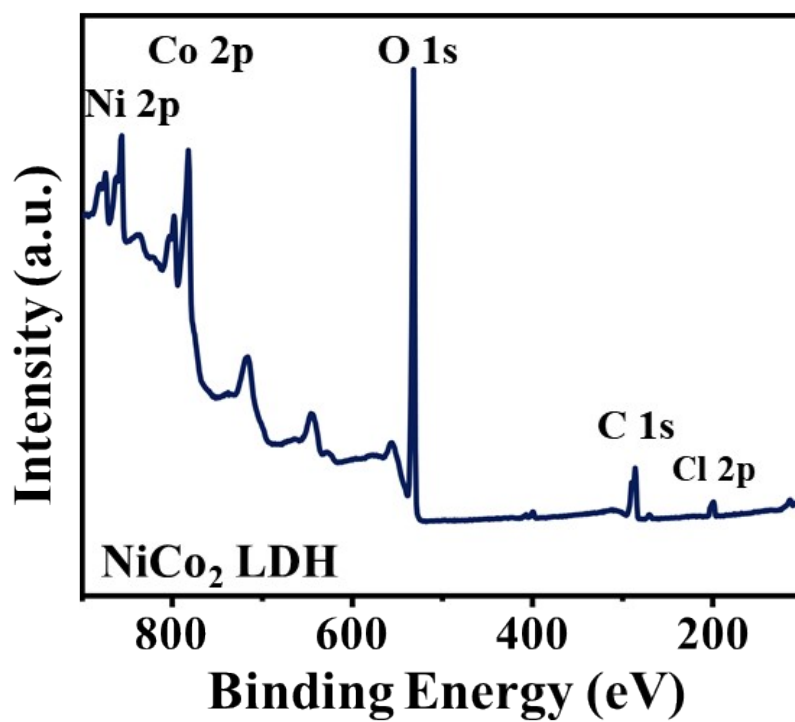

Fig. S7. XPS survey spectrum of NiCo<sub>2</sub>-Cl LDH.

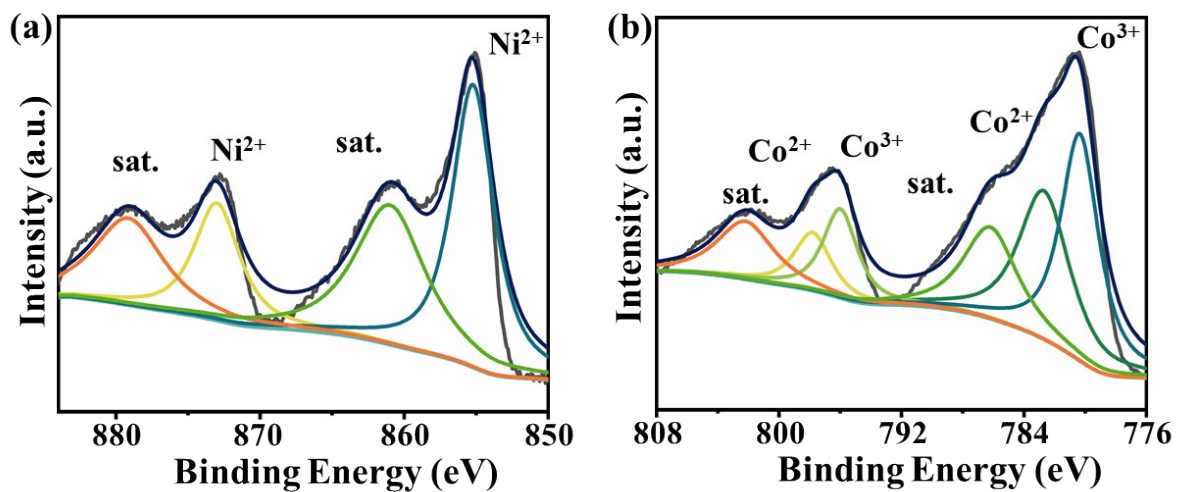

Fig. S8. High resolution XPS spectra of (a) Ni 2p and (b) Co 2p for NiCo<sub>2</sub>-Cl LDH.



**Table S1.** Results of ICP test and the element proportion of  $\text{Mo}_{0.3}\text{NiCo}_2\text{-Cl}$  LDH.

| Elements                                     | Mo    | Ni    | Co    |
|----------------------------------------------|-------|-------|-------|
| Mass concentration (ppm)                     | 10.30 | 20.06 | 41.31 |
| Molar concentration ( $\text{mmol L}^{-1}$ ) | 1.07  | 3.45  | 7.01  |

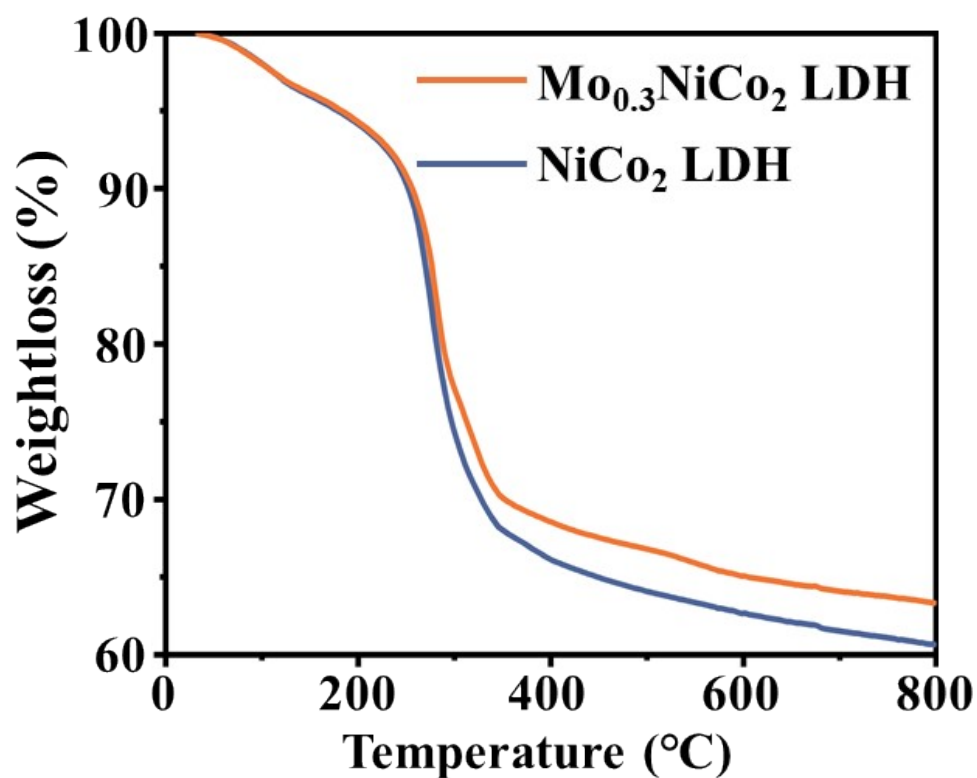

**Fig. S9.** Thermogravimetry analysis (TGA) of  $\text{Mo}_{0.3}\text{NiCo}_2\text{-Cl}$  LDH and  $\text{NiCo}_2\text{-Cl}$  LDH.

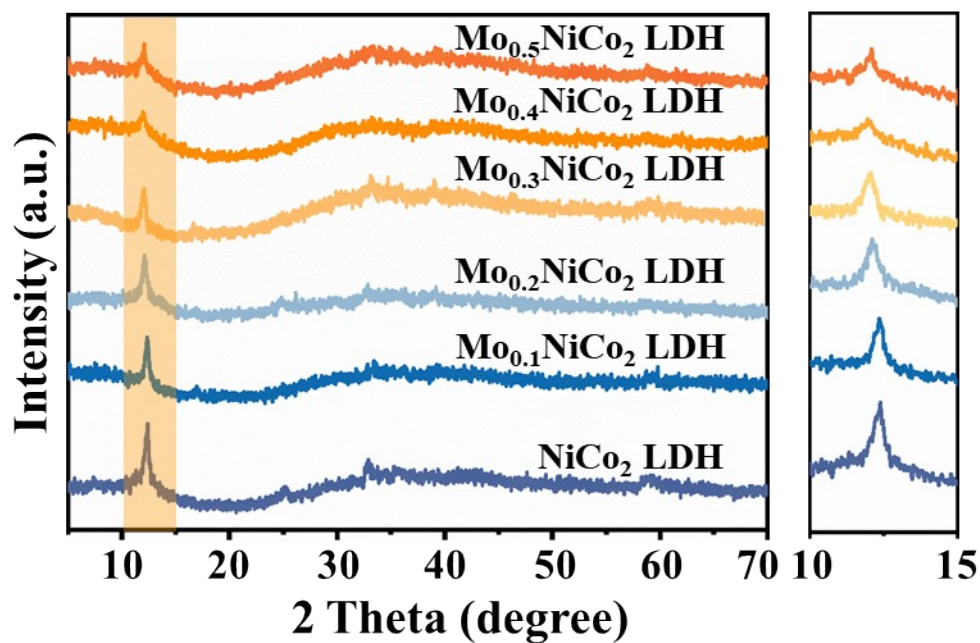

**Fig. S10.** XRD patterns of  $\text{Mo}_x\text{NiCo}_2\text{-Cl LDH}$  samples ( $x = 0, 0.1, 0.2, 0.3, 0.4$  and  $0.5$ ).

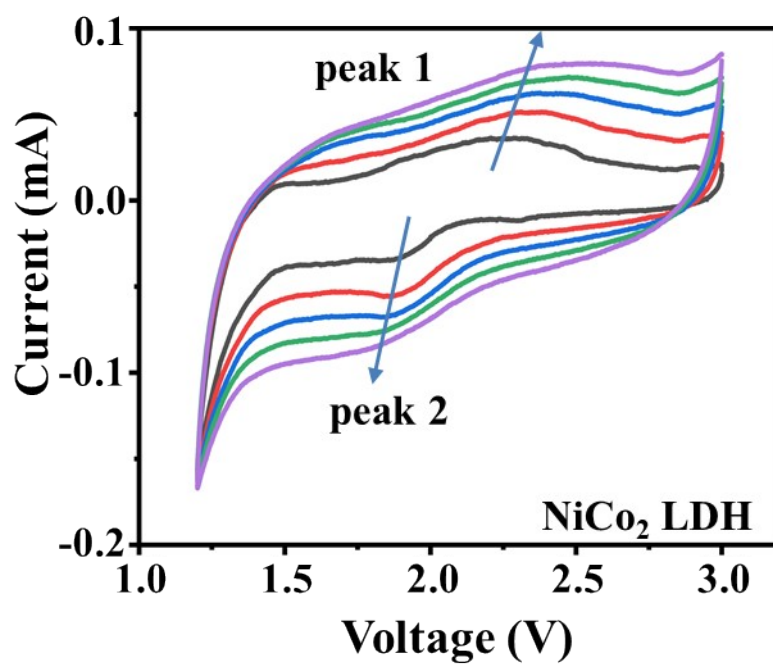

**Fig. S11.** CV curves of  $\text{NiCo}_2\text{-Cl LDH}$  at various scan rates ranging from  $0.1$  to  $0.5 \text{ mV s}^{-1}$ .

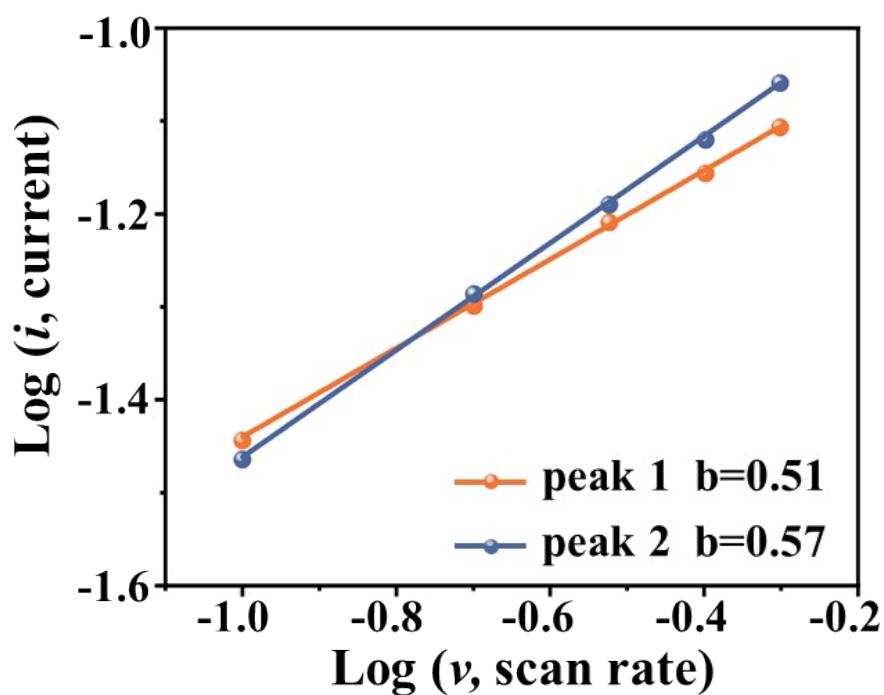

**Fig. S12.** The fitting plots between  $\log(i)$  and  $\log(v)$  of  $\text{NiCo}_2\text{-Cl}$  LDH.

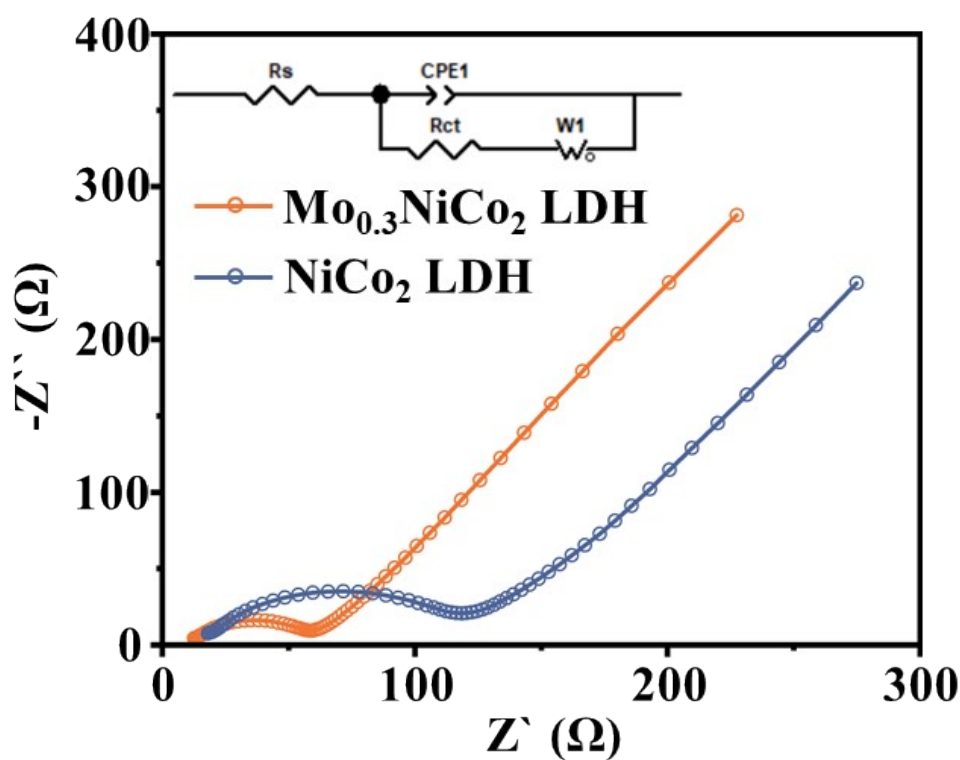

**Fig. S13.** Electrochemical impedance spectra (EIS) of  $\text{Mo}_{0.3}\text{NiCo}_2\text{-Cl}$  LDH and  $\text{NiCo}_2\text{-Cl}$  LDH electrodes.

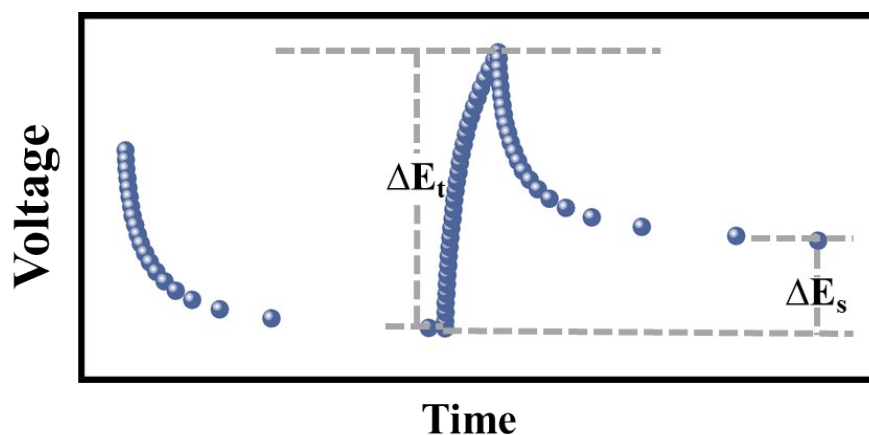

**Fig. S14.** Schematic illustration for a single step in GITT measurement to charge.

Galvanostatic intermittent titration technique (GITT) measurements were used to calculate the diffusion coefficient of bromide ions ( $D_{\text{Cl}^-}$ ) in  $\text{Mo}_x\text{NiCo}_2\text{-Cl}$  LDH cathode by using the following equation:

$$D_{\text{Cl}^-} = \frac{4}{\pi} \frac{mV}{\tau(MA)^2} \frac{\Delta E_s}{(\Delta E_t)^2} \quad (1)$$

where  $m$  (g) and  $M$  ( $\text{g mol}^{-1}$ ) are the loading mass and molecular weight of LDH materials;  $V$  ( $\text{cm}^3 \text{mol}^{-1}$ ) represents the molar volume;  $\tau$  (s) is constant current pulse time;  $A$  ( $\text{cm}^2$ ) is the surface area of electrode;  $\Delta E_s$  (V) and  $\Delta E_t$  (V) denote the change of steady-state voltage and the total change of the voltage during a constant pulse  $t$ . In this work, A current flow of  $30 \text{ mA g}^{-1}$  is applied to the CIBs with  $\tau = 10 \text{ min}$  and then stood for  $60 \text{ min}$  without current impulse.

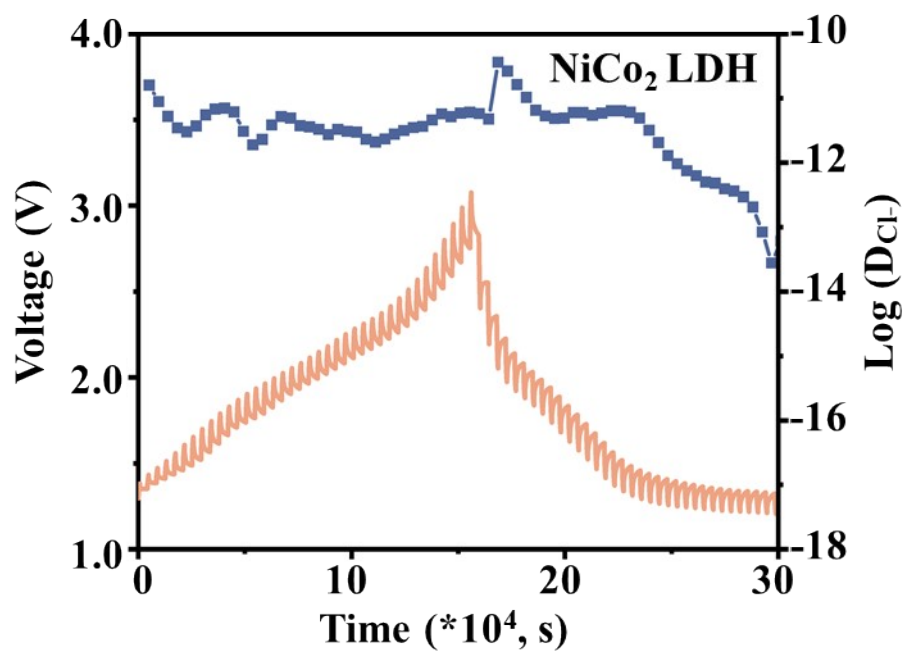

**Fig. S15.** GITT curves and the corresponding  $\text{Cl}^-$  ions diffusion coefficients of  $\text{NiCo}_2\text{-Cl}$  LDH.

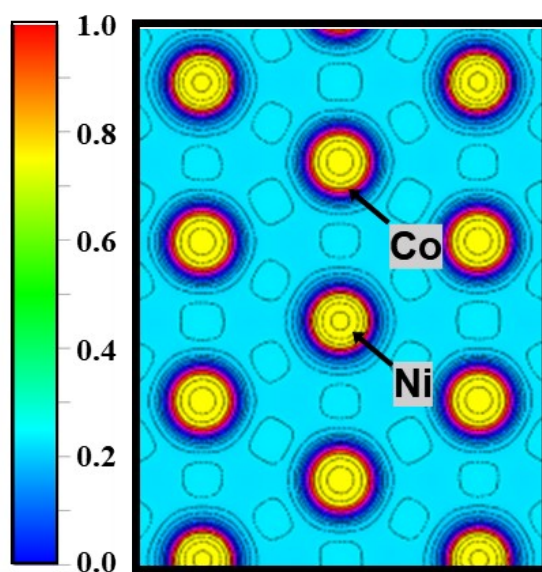

**Fig. S16.** Surface charge distribution of  $\text{NiCo}_2\text{-Cl}$  LDH.

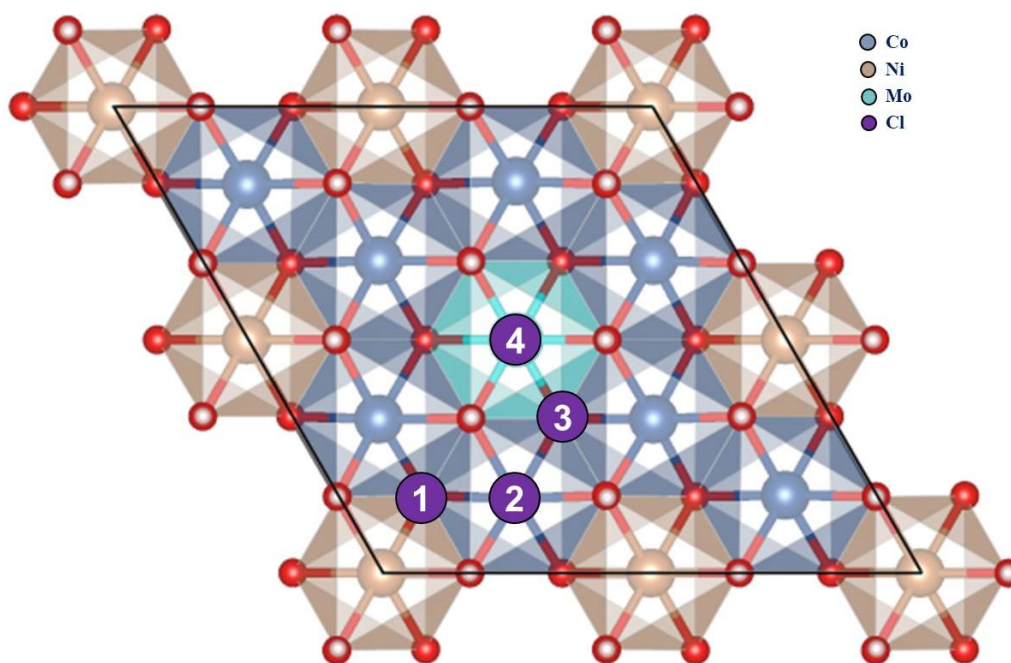

**Fig. S17.** Schematic diagram of adsorption sites of  $\text{Mo}_{0.3}\text{NiCo}_2\text{-Cl}$  LDH.

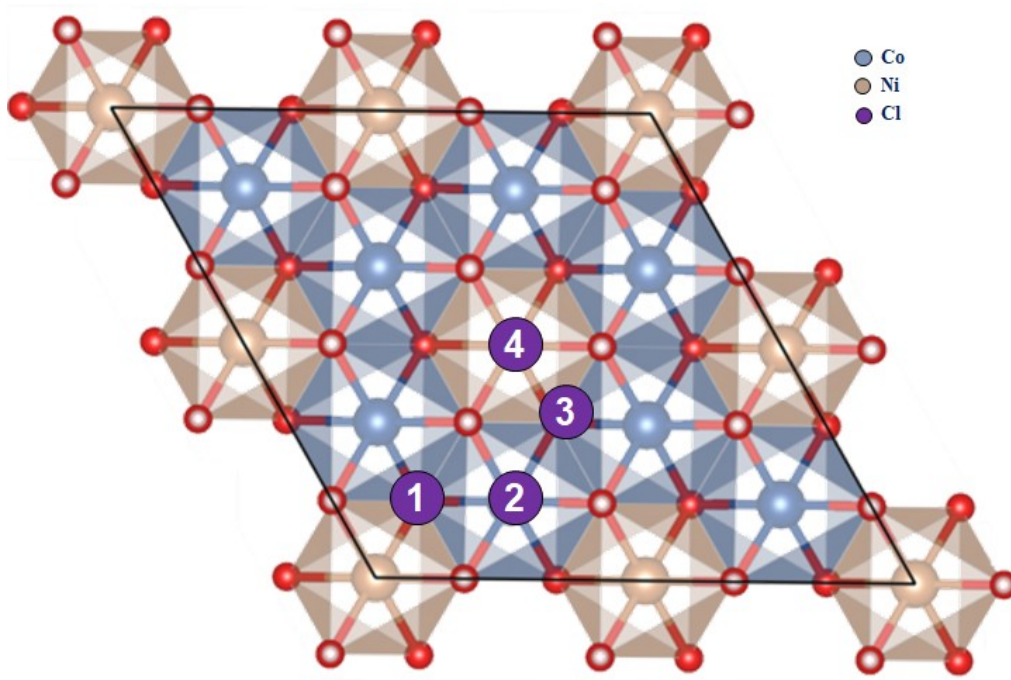

**Fig. S18.** Schematic diagram of adsorption sites of  $\text{NiCo}_2\text{-Cl}$  LDH.



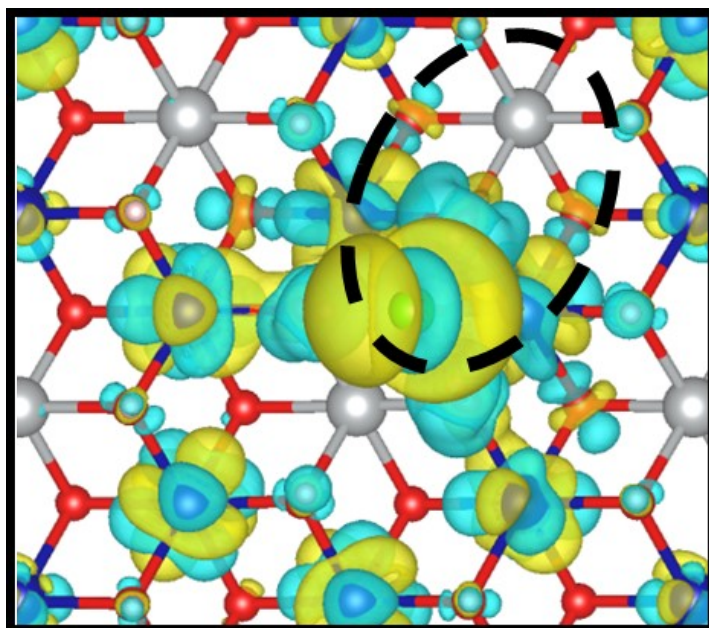

**Fig. S19.** Differential charge of adsorption process of NiCo<sub>2</sub>-Cl LDH.
